# Supplementary material
Source: publisher figshare collection journal article supplement (https://sage.figshare.com/ndownloader/files/21748284)
Supplement: Supplementary file 1 [file 21748284]

## Online Supplemental Material

**Supplementary Table 1. Data Availability in Analysis Cohort**

|                                                                                                                                                                                                                                                                                                                     | Number of Participants | Number of Events* |
|---------------------------------------------------------------------------------------------------------------------------------------------------------------------------------------------------------------------------------------------------------------------------------------------------------------------|------------------------|-------------------|
| <b>Included Participants</b>                                                                                                                                                                                                                                                                                        |                        |                   |
| Number of participants with a) $\geq 72$ hours of CGM data (including $\geq 24$ hours of data overnight), b) no pancreatic antibodies, and c) baseline central laboratory HbA1c $< 39$ mmol/l ( $< 5.7\%$ )                                                                                                         | <b>153</b>             | <b>NA</b>         |
| <b>Exercise-Related Analyses Cohorts</b>                                                                                                                                                                                                                                                                            |                        |                   |
| Total number of logged exercise events                                                                                                                                                                                                                                                                              | <b>127</b>             | <b>843</b>        |
| <i>During Exercise and Overnight Analyses</i>                                                                                                                                                                                                                                                                       |                        |                   |
| Number of exercise events with a) duration $\geq 20$ min, b) no meal within 30 minutes prior to exercise, c) $\geq 15$ min of CGM data during exercise, and d) $\geq 1$ CGM reading within 15 min prior to exercise                                                                                                 | <b>110</b>             | <b>451</b>        |
| Number of nights following exercise with $\geq 1$ hr overnight CGM data                                                                                                                                                                                                                                             | <b>94</b>              | <b>289</b>        |
| Number of nights following no exercise with $\geq 1$ hr overnight CGM data                                                                                                                                                                                                                                          | <b>134</b>             | <b>656</b>        |
| <i>During Exercise and Overnight Analyses by Exercise Type</i>                                                                                                                                                                                                                                                      |                        |                   |
| Number of exercise events with a) duration $\geq 20$ min, b) no meal within 30 minutes prior to exercise, c) $\geq 15$ min of CGM data during exercise, d) $\geq 1$ CGM reading within 15 min prior to exercise, and e) non-missing exercise type                                                                   | <b>110</b>             | <b>420</b>        |
| Number of nights following exercise with a) $\geq 1$ hr overnight CGM data, and b) non-missing exercise type                                                                                                                                                                                                        | <b>91</b>              | <b>270</b>        |
| <b>Meal-Related Analyses Cohorts</b>                                                                                                                                                                                                                                                                                |                        |                   |
| Total number of days with $\geq 1$ logged meal, including snacks                                                                                                                                                                                                                                                    | <b>152</b>             | <b>1423</b>       |
| Number of days with a) breakfast, lunch, and dinner logged (3 meals; alcoholic drinks consumed within $\pm 60$ minutes of meals were considered to be part of the meal), b) $\geq 4$ hr between meals, c) $\geq 1$ hr post-prandial CGM data per meal, and d) $\geq 1$ CGM reading in the 15 min prior to meal time | <b>56</b>              | <b>102</b>        |
| <b>Alcohol Analysis Cohort (N=88 participants aged <math>\geq 21</math> yr)</b>                                                                                                                                                                                                                                     |                        |                   |
| Number of days with alcoholic drinks logged and $\geq 1$ hr overnight CGM data                                                                                                                                                                                                                                      | <b>58</b>              | <b>234</b>        |
| Number of days with no alcoholic drinks logged and $\geq 1$ hr overnight CGM data                                                                                                                                                                                                                                   | <b>84</b>              | <b>534</b>        |
| <b>Dawn Analysis Cohort</b>                                                                                                                                                                                                                                                                                         |                        |                   |
| Number of nights with $\geq 15$ minutes of CGM data within $\pm 15$ minutes of 1, 3, and/or 5 AM                                                                                                                                                                                                                    | <b>149</b>             | <b>911</b>        |

\* Either number of exercise events, days, or nights, depending on the specified metric.

1

2

**Supplementary Table 2. Participant Characteristics (N=153)**

|                                                                       | <b>Overall<br/>(N=153)</b> | <b>Age &lt;18 yrs<br/>(n=57)</b> | <b>Age ≥18 yrs<br/>(n=96)</b> |
|-----------------------------------------------------------------------|----------------------------|----------------------------------|-------------------------------|
| <b>Age (years) mean ± SD</b>                                          | 31 ± 21                    | 12 ± 3                           | 42 ± 19                       |
| 6 to <12                                                              | 27 (18%)                   | 27 (47%)                         | NA                            |
| 12 to <18                                                             | 30 (20%)                   | 30 (53%)                         | NA                            |
| 18 to <25                                                             | 29 (19%)                   | NA                               | 29 (30%)                      |
| 25 to <60                                                             | 41 (27%)                   | NA                               | 41 (43%)                      |
| ≥60                                                                   | 26 (17%)                   | NA                               | 26 (27%)                      |
| <i>[min to max]</i>                                                   | [7 to 80]                  | [7 to 17]                        | [18 to 80]                    |
| <b>Gender – Male n (%)</b>                                            | 52 (34%)                   | 27 (47%)                         | 25 (26%)                      |
| <b>Race/ethnicity n (%)</b>                                           |                            |                                  |                               |
| White non-Hispanic                                                    | 129 (84%)                  | 53 (93%)                         | 76 (79%)                      |
| Black non-Hispanic                                                    | 2 (1%)                     | 0 (0%)                           | 2 (2%)                        |
| Hispanic or Latino                                                    | 15 (10%)                   | 3 (5%)                           | 12 (13%)                      |
| Asian                                                                 | 3 (2%)                     | 1 (2%)                           | 2 (2%)                        |
| More than one race                                                    | 4 (3%)                     | 0 (0%)                           | 4 (4%)                        |
| <b>Body mass index (BMI) mean ± SD</b>                                |                            |                                  |                               |
| BMI (kg/m <sup>2</sup> )                                              | NA                         | NA                               | 24.4 ± 3.2                    |
| BMI percentile                                                        | NA                         | 52% ± 26%                        | NA                            |
| <b>BMI Category* n (%)</b>                                            |                            |                                  |                               |
| Underweight                                                           | 3 (2%)                     | 0 (0%)                           | 3 (3%)                        |
| Normal Weight                                                         | 106 (69%)                  | 55 (96%)                         | 51 (53%)                      |
| Overweight                                                            | 44 (29%)                   | 2 (4%)*                          | 42 (44%)                      |
| <b>HbA1c mean ± SD – mmol (%)</b>                                     | 32 ± 3.3<br>(5.1 ± 0.3)    | 32 ± 2.2<br>(5.1 ± 0.2)          | 32 ± 3.3<br>(5.1 ± 0.3)       |
| <b>Min to Max – mmol (%)</b>                                          | 49 ± 38<br>(4.2 to 5.6)    | 49 ± 37<br>(4.5 to 5.5)          | 49 ± 38<br>(4.2 to 5.6)       |
| <b>Has first-degree biological family member with T1D<sup>‡</sup></b> | <i>N=150</i>               | <i>N=57</i>                      | <i>N=93</i>                   |
| <b>n (%)</b>                                                          | 49 (33%)                   | 29 (51%)                         | 20 (22%)                      |
| Parent with T1D                                                       | 10 (7%)                    | 5 (9%)                           | 5 (5%)                        |
| Sibling with T1D                                                      | 26 (17%)                   | 25 (44%)                         | 1 (1%)                        |
| Child with T1D                                                        | 15 (10%)                   | 0 (0%)                           | 15 (16%)                      |

3

4

5

6

\*The underweight, normal weight, and overweight BMI categories for participants aged ≥18 years are: <18.5, 18.5 to <24.9, and ≥24.9, respectively. The underweight, normal weight, and overweight BMI percentile categories for participants aged <18 years are: <5<sup>th</sup> percentile, 5<sup>th</sup> to <85<sup>th</sup> percentile, and ≥85<sup>th</sup> percentile, respectively (calculated using the 2000 CDC growth charts). The two pediatric participants in the overweight category had BMI percentile of <86%.

7

<sup>‡</sup>3 participants indicated unknown for having a first-degree family member with T1D and were excluded from denominator.

**Supplementary Table 3. Effect of Alcohol on Overnight Glycemia**

|                                                                                    | Nights following Alcohol Consumption <sup>a</sup> |                        |                         | Nights following No Alcohol Consumption <sup>c</sup> |
|------------------------------------------------------------------------------------|---------------------------------------------------|------------------------|-------------------------|------------------------------------------------------|
|                                                                                    | Overall                                           | 1-2 Drinks             | ≥3 Drinks               |                                                      |
| <b>No. of Participants / No. of Nights</b>                                         | 58/234                                            | 51/177                 | 28/50                   | 84/534                                               |
| <b>Overnight <sup>b</sup> Mean Glucose (mg/dL) mean (SD)-<br/>mmol/l [mg/dL]</b>   | 5.4 (0.5)<br>[99 (10)]                            | 5.4 (0.6)<br>[99 (11)] | 5.5 (0.6)<br>[100 (12)] | 5.6 (0.5)<br>[101 (10)]                              |
| <b>Overnight <sup>b</sup> Nadir Glucose (mg/dL) mean (SD) –<br/>mmol/l [mg/dL]</b> | 4.7 (0.6)<br>[85 (11)]                            | 4.7 (0.6)<br>[85 (12)] | 4.7 (0.7)<br>[85 (13)]  | 4.7 (0.4)<br>[86 (9)]                                |

Summary statistics are on a subject level. Analysis limited to participants 21 years of age and older. If alcohol consumption was logged but number of drinks was not specified, it is assumed that the participant had at least 1 drink, so the night is included in the overall category but not in the 1-2 or ≥3 drinks category.

a – A day in which consumption of at least one alcoholic drink between the hours of 5 AM and midnight was logged.

b – Midnight to 5 AM. Minimum 1 hr of CGM data during each night.

c – A day in which no alcoholic drinks were logged.

**Supplementary Table 4. Morning Glucose Levels**

|                                                                                 | All<br>Participants     | Age Group (yrs)         |                         |                        |                        |                         |
|---------------------------------------------------------------------------------|-------------------------|-------------------------|-------------------------|------------------------|------------------------|-------------------------|
|                                                                                 |                         | 6-<12                   | 12-<18                  | 18-<25                 | 25-<60                 | ≥60                     |
| <b>All</b>                                                                      |                         |                         |                         |                        |                        |                         |
| <b>No. of Participants / No. of Days<sup>a</sup></b>                            | 149/911                 | 26/129                  | 28/179                  | 29/214                 | 40/234                 | 26/155                  |
| <b>Mean glucose level at 1 AM<sup>b</sup> <i>mean (SD) – mmol/l [mg/dL]</i></b> | 5.6 (0.6)<br>[102 (12)] | 5.5 (0.7)<br>[100 (14)] | 5.5 (0.5)<br>[100 (10)] | 5.6 (0.4)<br>[101 (9)] | 5.6 (0.4)<br>[101 (9)] | 5.9 (0.7)<br>[108 (14)] |
| <b>Mean glucose level at 3 AM<sup>c</sup> <i>mean (SD) – mmol/l [mg/dL]</i></b> | 5.3 (0.5)<br>[97 (10)]  | 5.2 (0.6)<br>[95 (11)]  | 5.2 (0.4)<br>[95 (9)]   | 5.3 (0.4)<br>[96 (8)]  | 5.3 (0.4)<br>[96 (9)]  | 5.6 (0.7)<br>[102 (13)] |
| <b>Mean glucose level at 5 AM<sup>d</sup> <i>mean (SD) – mmol/l [mg/dL]</i></b> | 5.2 (0.5)<br>[95 (10)]  | 5.1 (0.6)<br>[93 (12)]  | 5.1 (0.3)<br>[93 (7)]   | 5.2 (0.4)<br>[94 (8)]  | 5.2 (0.4)<br>[95 (9)]  | 5.5 (0.6)<br>[100 (11)] |
| <b>Females</b>                                                                  |                         |                         |                         |                        |                        |                         |
| <b>No. of Participants / No. of Days<sup>a</sup></b>                            | 99/620                  | 13/70                   | 16/113                  | 19/137                 | 32/196                 | 19/104                  |
| <b>Mean glucose level at 1 AM<sup>b</sup> <i>mean (SD) – mmol/l [mg/dL]</i></b> | 5.6 (0.5)<br>[102 (10)] | 5.7 (0.6)<br>[103 (11)] | 5.4 (0.6)<br>[99 (12)]  | 5.7 (0.4)<br>[103 (8)] | 5.6 (0.4)<br>[101 (9)] | 5.8 (0.6)<br>[105 (11)] |
| <b>Mean glucose level at 3 AM<sup>c</sup> <i>mean (SD) – mmol/l [mg/dL]</i></b> | 5.4 (0.4)<br>[98 (8)]   | 5.4 (0.3)<br>[99 (7)]   | 5.2 (0.4)<br>[95 (9)]   | 5.3 (0.4)<br>[97 (8)]  | 5.3 (0.4)<br>[97 (9)]  | 5.5 (0.4)<br>[100 (9)]  |
| <b>Mean glucose level at 5 AM<sup>d</sup> <i>mean (SD) – mmol/l [mg/dL]</i></b> | 5.3 (0.4)<br>[96 (9)]   | 5.3 (0.3)<br>[97 (7)]   | 5.1 (0.4)<br>[93 (8)]   | 5.2 (0.4)<br>[95 (8)]  | 5.2 (0.4)<br>[95 (9)]  | 5.4 (0.5)<br>[98 (10)]  |
| <b>Males</b>                                                                    |                         |                         |                         |                        |                        |                         |
| <b>No. of Participants / No. of Days<sup>a</sup></b>                            | 50/291                  | 13/59                   | 12/66                   | 10/77                  | 8/38                   | 7/51                    |
| <b>Mean glucose level at 1 AM<sup>b</sup> <i>mean (SD) – mmol/l [mg/dL]</i></b> | 5.6 (0.7)<br>[101 (14)] | 5.3 (0.9)<br>[96 (17)]  | 5.6 (0.4)<br>[102 (9)]  | 5.3 (0.5)<br>[97 (10)] | 5.4 (0.4)<br>[99 (8)]  | 6.4 (1.1)<br>[116 (20)] |
| <b>Mean glucose level at 3 AM<sup>c</sup> <i>mean (SD) – mmol/l [mg/dL]</i></b> | 5.3 (0.7)<br>[96 (13)]  | 5.0 (0.7)<br>[91 (13)]  | 5.2 (0.4)<br>[95 (9)]   | 5.2 (0.5)<br>[95 (10)] | 5.2 (0.4)<br>[94 (8)]  | 6.0 (0.9)<br>[109 (18)] |
| <b>Mean glucose level at 5 AM<sup>d</sup> <i>mean (SD) – mmol/l [mg/dL]</i></b> | 5.2 (0.6)<br>[94 (11)]  | 4.9 (0.8)<br>[89 (15)]  | 5.1 (0.3)<br>[93 (7)]   | 4.9 (0.2)<br>[90 (5)]  | 5.3 (0.4)<br>[96 (8)]  | 5.8 (0.7)<br>[105 (14)] |

Summary statistics are on a subject-level.

a - Only days with ≥ 15 minutes of glucose readings within each time period were included.

- b – Mean glucose from 12:45 AM to <1:15 AM.
- c – Mean glucose from 2:45 AM to <3:15 AM.
- d – Mean glucose from 4:45 AM to <5:15 AM.
